# Supplementary material
Source: publisher site journal article supplement (https://www.dovepress.com/article/405509)
Supplement: Supplementary file 1 [file get_supplementary_file.php]

**Supplementary file 1: Association between acne relapse and patient's practice towards acne treatment**

| **Variables** | **Total** | **Acne relapse** | | **P value** |
| --- | --- | --- | --- | --- |
| **Yes** | **No** |
| **Prescription OI** | | | | |
| Yes  No | 212  13 | 74 (34.9%)  6 (46.2%) | 138 (65.1%)  7 (53.8%) | 0.41 |
| **Use OI with fatty meal** | | | | |
| Yes  No | 98  127 | 29 (29.6%)  51 (40.2%) | 69 (70.4%)  76 (59.8%) | 0.10 |
| **Use of OI before/after meal** | | | | |
| After  Before | 211  14 | 74 (35.1%)  6 (42.9%) | 137 (64.9%)  8 (57.1%) | 0.55 |
| **Use of skin-care ways** | | | | |
| Yes  No | 155  70 | 51 (32.9%)  29 (41.4%) | 104 (67.1%)  41 (58.6%) | 0.21 |
